# Supplementary material
Source: Springer Nature journal article supplement (https://www.springermedizin.de/resource/supplementary/13058_2011_2869_MOESM4_ESM.pdf/9702758)

**E-cadherin**

**Ki67**

**p53**

**positive**

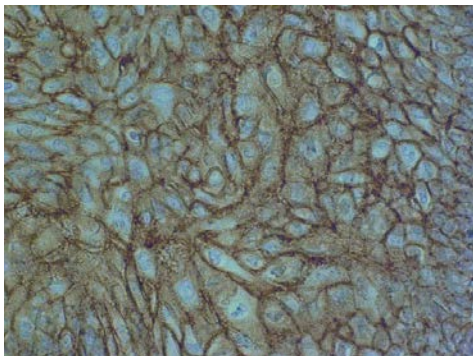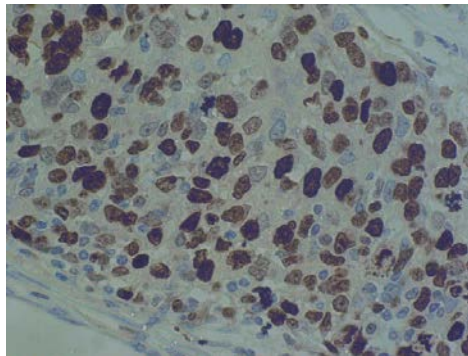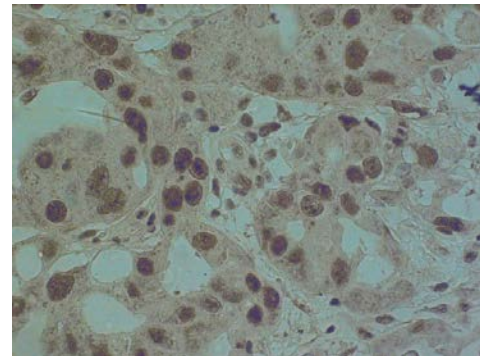

**100%**

**70%**

**77%**

**negative**

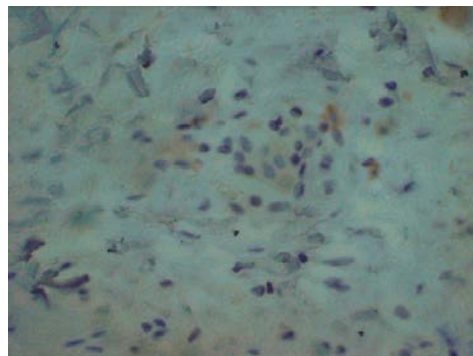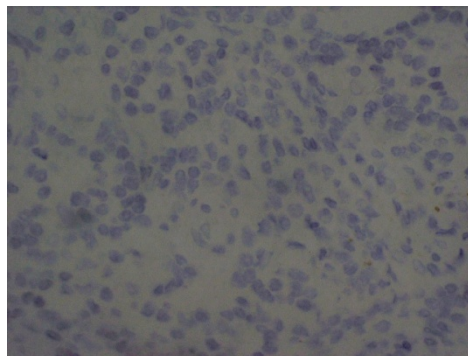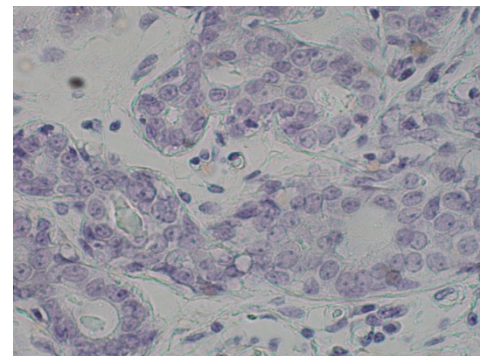

**0%**

**0%**

**0%**

Supplement: MOESM4 [file 9702758]
